# Supplementary material for: Gene expression profiling of lymphoblastoid cell lines from monozygotic twins discordant in severity of autism reveals differential regulation of neurologically relevant genes
Source: PubMed Central journal article supplement (PMC1525191; doi:10.1186/1471-2164-7-118), 2006-05-18
Supplement: 1471-2164-7-118-S3.pdf [file 1471-2164-7-118-S3.pdf]

**Additional file 3. Case description of subjects from whom LCL were derived and used in this study.**

| Individual ID | Blood ID | Ethnicity          | Zygoty | Age* | Status              | PPVT (%ile) | Raven   |
|---------------|----------|--------------------|--------|------|---------------------|-------------|---------|
| AU002704      | HI0361   | Caucasian          | MZ     | 8    | Autism              |             | 108     |
| AU002703      | HI0360   | Caucasian          | MZ     | 8    | Br. Spec.           | 79 (8)      | 105     |
|               |          |                    |        |      |                     |             |         |
| AU057904      | HI0809   | Caucasian          | MZ     | 6    | Autism              | 35 (0.1)    | 83      |
| AU057905      | HI0810   | Caucasian          | MZ     | 6    | Br. Spec.           | 117 (87)    | 110     |
| AU057903      | HI0813   | Caucasian          |        | 10   | nonautistic         |             |         |
|               |          |                    |        |      |                     |             |         |
|               |          |                    |        |      |                     |             |         |
| AU0885303     | HI2369   | Caucasian          | MZ     | 16   | Autism              | No data     | No data |
| AU0885302     | HI2368   | Caucasian          | MZ     | 16   | NQA                 | "           | "       |
| AU0885304     | HI2357   | Caucasian          |        | 19   | nonautistic         | "           | "       |
|               |          |                    |        |      |                     |             |         |
| AU0616301     | HI2595   | Caucasian          | MZ     | 15   | Autism <sup>‡</sup> | 92 (30)     | 104     |
| AU0616302     | HI2596   | Caucasian          | MZ     | 15   | Autism <sup>‡</sup> | 97 (42)     | 94      |
|               |          |                    |        |      |                     |             |         |
| AU0616303     | HI2597   | Mixed,<br>Hispanic | MZ     | 12   | Autism              | 40 (< 0.1)  | 80      |
| AU0616304     | HI2598   | Mixed,<br>Hispanic | MZ     | 12   | Autism              | 66 (1)      | 107     |
|               |          |                    |        |      |                     |             |         |
| AU1165305     | HI2745   | Caucasian          | MZ     | 9    | nonautistic         |             |         |
| AU1165306     | HI2744   | Caucasian          | MZ     | 9    | nonautistic         |             |         |

\*Age at time of inclusion in study

<sup>‡</sup>Diagnosed with ADOS rather than ADIR

Br. Spec.: Defined as “broad spectrum” by AGRE

NQA: Defined as “not quite autistic” by AGRE
