# Supplementary material for: Gene expression profiling of lymphoblastoid cell lines from monozygotic twins discordant in severity of autism reveals differential regulation of neurologically relevant genes
Source: PubMed Central journal article supplement (PMC1525191; doi:10.1186/1471-2164-7-118), 2006-05-18
Supplement: 1471-2164-7-118-S4.pdf [file 1471-2164-7-118-S4.pdf]

## Add'l file 4\_Differentially expressed genes within or across twin sets mapped within or close to autism candidate genes or quantitative trait loci

| GenBank # | Gene                      | Physical map                  | Band     | Reported QTL or ACG*              | Map Location <sup>A</sup>          | Refs.  |
|-----------|---------------------------|-------------------------------|----------|-----------------------------------|------------------------------------|--------|
| H99699    | ACO2                      | chr22:40,249,136-40,249,479   | 22q13.2  |                                   |                                    |        |
| AA779727  | <b>ADAM19<sup>1</sup></b> | chr5:156,836,890-156,839,743  | 5q33.3   | Language QTL                      | chr5: 125 (98-152) <sup>y</sup>    | 59     |
| T49652    | <b>ALOX5AP</b>            | chr13:30,207,643-30,236,962   | 13q12.3  | AUTS3, HTR2A-2                    | 13q14-q22. 13q14-q21               | 64, 65 |
| AA147170  | <b>ALS4</b>               | chr9:132,168,835-132,169,190  | 9q34.13  | dopamine beta-hydroxylase         | chr9:135,574,213-135,774,497; 9q34 | 60     |
| R01732    | AMPD3                     | chr11:10,433,286-10,485,260   | 11p15.4  |                                   |                                    |        |
| AA991590  | APOC1                     | chr19:50,110,006-50,114,439   | 19q13.31 | APOE                              | 19q13.2                            | 66     |
| AA478589  | <b>APOE</b>               | chr19:50,103,783-50,104,362   | 19q13.31 | APOE                              | 19q13.2                            |        |
| AA676466  | <b>ASS</b>                | chr9:130,384,688-130,405,958  | 9q34.11  | dopamine beta-hydroxylase         | chr9:135,574,213-135,774,497; 9q34 | 60     |
| H21041    | <b>ATF3</b>               | chr1:209,181,152-209,181,560  | 1q32.3   |                                   |                                    |        |
| AI017382  | ATXN7L1                   | chr7:105,109,492-105,111,716  | 7q22.3   | AUTS 1 on chromosome 7q; RELN     | chr7:100,270,094-100,470,368; 7q22 | 61, 62 |
| AA702350  | <b>AUTS2</b>              | chr7:69,701,671-69,702,124    | 7q11.22  | AUTS2                             | chr7:69,701,671-69,702,124         | 68     |
| AI341427  | BCAT1                     | chr12:24,880,649-24,894,152   | 12p12.1  |                                   |                                    |        |
| AA984646  | C7orf2                    | chr7:156,090,884-156,091,208  | 7q36.3   | EN2                               | 7q36                               | 71     |
| AA430367  | CBS                       | chr21:43,346,369-43,369,493   | 21q22.3  |                                   |                                    |        |
| R47893    | CCL3L1                    | chr17:31,647,966-31,648,404   | 17q12    | Language QTL                      | chr17: 45 (13-96)                  | 59     |
| R00276    | CD38                      | chr4:15,456,170-15,527,338    | 4p15.32  | HLN2                              | 4p15.3                             | 73     |
| AA111969  | CD83                      | chr6:14,244,635-14,244,846    | 6p23     |                                   |                                    |        |
| AA283949  | CDC14A                    | chr1:100,697,433-100,697,853  | 1p21.2   |                                   |                                    |        |
| N67039    | CDK6                      | chr7:91,879,642-91,880,092    | 7q21.2   | CMT2F                             | 7q11-21                            | 74     |
| H15267    | <b>CHL1</b>               | chr3:274,882-275,218          | 3p26.3   | KIAA0121                          | 3p25.2                             | 61     |
| AA682637  | CHST2                     | chr3:144,324,253-144,324,489  | 3q23     | Language QTL                      | chr3: 147 (126-170)                | 59     |
| R78530    | COTL1                     | chr16:83,156,719-83,157,052   | 16q24.1  | Language QTL                      | chr16: 134 (127) (78)              | 59     |
| AA521362  | CR2                       | chr1:204,051,081-204,051,632  | 1q32.2   |                                   |                                    |        |
| AA884403  | <b>CTF1</b>               | chr16:30,822,197-30,822,382   | 16p11.2  | Nonverbal communication QTL       | 16p12-13                           | 63     |
| AI400399  | CYP7B1                    | chr8:65,671,716-65,679,901    | 8q12.3   |                                   |                                    |        |
| AI371096  | <b>DAPK1</b>              | chr9:87,552,642-87,553,099    | 9q21.33  |                                   |                                    |        |
| W00789    | <b>DST</b>                | chr6:56,636,931-56,637,351    | 6p12.1   |                                   |                                    |        |
| AA933744  | ECAT11                    | chr1:62,388,845-62,389,499    | 1p31.3   |                                   |                                    |        |
| AA446027  | <b>EGR2</b>               | chr10:64,241,762-64,242,293   | 10q21.3  | Language QTL                      | chr10: 107 (72-126)                | 59     |
| AA450353  | ELMOD1                    | chr11:107,042,443-107,042,715 | 11q22.3  |                                   |                                    |        |
| AA448599  | <b>F13A1</b>              | chr6:6,089,901-6,090,339      | 6p25.1   |                                   |                                    |        |
| AA149640  | <b>FLT1</b>               | chr13:27,859,860-27,860,230   | 13q12.3  | AUTS3, HTR2A-2                    | 13q14-q22. 13q14-q21               | 64, 65 |
| AA070902  | GGA2                      | chr16:23,386,296-23,388,914   | 16p12.1  | RP22                              | 16p12.3-p12.1                      | 73     |
| N58443    | GPR55                     | chr2:231,599,868-231,600,296  | 2q37.1   |                                   |                                    |        |
| AA149096  | HCK                       | chr20:30,145,453-30,153,082   | 20q11.21 |                                   |                                    |        |
| AI375302  | <b>HMGB1</b>              | chr13:29,930,931-29,931,301   | 13q12.3  | AUTS3, HTR2A-2                    | 13q14-q22. 13q14-q21               | 64, 65 |
| AA620511  | HSPA8                     | chr11:122,433,412-122,433,823 | 11q24.1  |                                   |                                    |        |
| W73790    | IGLL1                     | chr22:22,239,869-22,241,827   | 22q11.23 |                                   |                                    |        |
| AA458965  | IL32, NK4                 | chr16:3,055,381-3,059,572     | 16p13.3  | Language QTL                      | chr16: 8 (0-20)                    | 59     |
| AA406546  | <b>IL6ST</b>              | chr5:55,271,809-55,272,305    | 5q11.2   | Language QTL                      | chr5: 40 (0-67)                    | 59     |
| AI539460  | IL7                       | chr8:79,808,141-79,814,872    | 8q21.12  |                                   |                                    |        |
| AI380522  | <b>ITGB7</b>              | chr12:51,871,374-51,872,549   | 12q13.13 | arginine vasopressin receptor, 1A | 12q14-q15                          | 67     |
| AA679503  | <b>KIF1B</b>              | chr1:10,301,980-10,302,404    | 1p36.22  | Language QTL                      | chr1: 30 (9-41)                    | 59     |

Add'l file 4\_Differentially expressed genes within or across twin sets mapped within or close to autism candidate genes or quantitative trait loci

|          |                   |                                                                                           |          |                                          |                                             |        |
|----------|-------------------|-------------------------------------------------------------------------------------------|----------|------------------------------------------|---------------------------------------------|--------|
| AA029283 | LARGE             | chr22:31,993,629-31,994,110                                                               | 22q12.3  |                                          |                                             |        |
| T83159   | LSP1              | chr11:1,865,114-1,869,808                                                                 | 11p15.5  |                                          |                                             |        |
| AI351740 | <b>LTB</b>        | chr6:31,656,328-31,656,552                                                                | 6p21.33  |                                          |                                             |        |
| H09062   | MLSTD1            | chr12:29,375,639-29,375,879                                                               | 12p11.22 |                                          |                                             |        |
| W07099   | <b>NAGLU</b>      | chr17:37,948,670-37,949,193                                                               | 17q21.2  | Language QTL; 17q21 fine map             | chr17: 45 (13-96)                           | 59, 67 |
| AA917693 | NR3C1             | chr5:142,768,749-142,794,477                                                              | 5q31.3   | Language QTL                             | chr5: 125 (98-152)                          | 59     |
| AA598611 | <b>NR4A2</b>      | chr2:157,007,118-157,007,513                                                              | 2q24.1   | cAMP-GEFII, DLX1, DLX2, HOXD1, NE        | 2q21-q33                                    | 70     |
| AA707195 | <b>NTRK2</b>      | chr9:84,655,356-84,655,789                                                                | 9q21.33  |                                          |                                             |        |
| AA044267 | P2RX5             | chr17:3,523,268-3,546,395                                                                 | 17p13.2  | FIMG1                                    | 17p13                                       | 73     |
| N50114   | <b>PAG</b>        | chr8:82,048,965-82,049,320                                                                | 8q21.13  |                                          |                                             |        |
| AA972337 | PAWR              | chr12:78,488,215-78,488,615                                                               | 12q21.2  |                                          |                                             |        |
| AA489629 | PBEF1             | chr7:105,482,685-105,483,083                                                              | 7q22.3   | AUTS 1 on chromosome 7q; RELN            | chr7:100,270,094-100,470,368; 7q22          | 61,62  |
| AA022886 | PITPNC1           | chr17:63,119,259-63,119,494                                                               | 17q24.2  |                                          |                                             |        |
| H95977   | <b>PLA1A, Nmd</b> | chr3:120,819,670-120,830,364                                                              | 3q13.33  | Language QTL                             | chr3: 147 (126-170)                         | 59     |
| AI016039 | PLXNB2            | chr22:49,015,865-49,016,311                                                               | 22q13.33 |                                          |                                             |        |
| R80217   | <b>PTGS2</b>      | chr1:183,372,637-183,372,865                                                              | 1q31.1   | Reanalysis of whole genome scan          | chr1:183,000,000                            | 76     |
| AI126054 | PTK2              | chr8:141,958,441-141,958,919                                                              | 8q24.3   | Nonverbal communication QTL              | 8q23-24                                     | 63     |
| R79082   | PTPRK             | chr6:128,332,083-128,332,365                                                              | 6q22.33  |                                          |                                             |        |
| AA173755 | <b>ROBO1</b>      | chr3:78,729,082-78,729,496                                                                | 3p12.3   |                                          |                                             |        |
| AA495950 | RRM2B             | chr8:103,285,907-103,286,293                                                              | 8q22.3   | Nonverbal communication QTL              | 8q23-24                                     | 63     |
| AA630734 | SARS              | chr1:109,491,951-109,492,822                                                              | 1p13.3   | Nonverbal communication QTL              | 1p13-q12                                    | 63     |
| AA457700 | <b>SCD</b>        | chr10:102,112,573-102,112,966                                                             | 10q24.31 | Language QTL                             | chr10: 107 (72-126)                         | 59     |
| AA708955 | SCHIP1            | chr3:161,097,412-161,097,852                                                              | 3q25.33  | Language QTL                             | chr3: 147 (126-170)                         | 59     |
| R27457   | SLC38A2           | chr12:45,040,635-45,040,927                                                               | 12q13.11 | arginine vasopressin receptor, 1A        | 12q14-q15                                   | 67     |
| AI091460 | SOS1              | chr7:127,471,196-127,495,720                                                              | 7q32.1   | GMR8                                     | 7q31-33                                     | 72     |
| AI091671 | Spidroin 1        | chr15:72,454,484-72,454,905                                                               | 15q24.1  | SLP-1, hUNC-24                           | 15q24-25                                    | 77     |
| N63153   | SPRED1            | chr15:36,433,411-36,433,545                                                               | 15q14    |                                          |                                             |        |
| AI040821 | TERE1             | chr1:11,281,557-11,281,945                                                                | 1p36.22  | Language QTL                             | chr1: 30 (9-41)                             | 59     |
| AA504211 | TNFSF11           | chr13:42,079,796-42,080,148                                                               | 13q14.11 | AUTS3, HTR2A-2                           | 13q14-q22. 13q14-q21                        | 64, 65 |
| AA970358 | TSLP              | chr5:110,440,005-110,440,383                                                              | 5q22.1   | Language QTL                             | chr5: 125 (98-152) <sup>†</sup>             | 59     |
| N68465   | UAP1              | chr1:159,290,229-159,300,829                                                              | 1q23.3   |                                          |                                             |        |
| H24011   | Unknown           | chr7:140,628,082-140,628,452                                                              | 7q34     | OTSC2, Language QTL                      | 7q34-36; chr7:139465749 - 154005714         | 74, 78 |
| AI275120 | Unknown           | chr2:149,896,904-149,897,281                                                              | 2q23.2   | cAMP-GEFII, DLX1, DLX2, HOXD1, NE        | 2q21-q33                                    | 70     |
| AA040389 | Unknown           | chr4:100,348,265-100,348,631                                                              | 4q23     |                                          |                                             |        |
| AA682565 | Unknown           | chr4:185,630,597-185,630,964                                                              | 4q35.1   |                                          |                                             |        |
| H17800   | Unknown           | chr9:3,208,297-3,208,697                                                                  | 9p24.2   |                                          |                                             |        |
|          |                   | <sup>†</sup> Genes in <b>bold</b> are involved in nervous system development and function |          | <sup>*</sup> ACG = autism candidate gene | <sup>Δ</sup> Identified by genetic analysis |        |
|          |                   |                                                                                           |          |                                          | <sup>‡</sup> Peak and (region)              |        |
