# Supplementary material for: Gene expression profiling of lymphoblastoid cell lines from monozygotic twins discordant in severity of autism reveals differential regulation of neurologically relevant genes
Source: PubMed Central journal article supplement (PMC1525191; doi:10.1186/1471-2164-7-118), 2006-05-18
Supplement: 1471-2164-7-118-S5.pdf [file 1471-2164-7-118-S5.pdf]

**Additional file 5. Primers used for quantitative RT-PCR analyses**

| Gene Name       | GenBank # | Forward Primer (5' to 3') | Reverse Primer (5' to 3') |
|-----------------|-----------|---------------------------|---------------------------|
| ASS             | AA676405  | GAAGTGCGCAAAATCAAACA      | CTGCACTTTCCTTCCACTC       |
| CHL1            | H15627    | TTTAGATGCACCCGTGTTG       | AGCACACCAACATTTCTCATT     |
| DAPK1           | AI371096  | CGCTACCTCTCTGTCCCTTG      | AGGATTCCCTTCTCCCCTTT      |
| EGR2            | AA446027  | CCCATCACAGGTTTTTGACC      | TCTTTTTGCTGTCCCCACTT      |
| EIF2C2          | T90067    | GCGTGTCTGTTTGGCTTTG       | CCTGCAAGGCAAGGAATG        |
| F13A1           | AA448599  | CACCCATCTCTCAGGAATCA      | CACTAGATCCGCCAGCTTCT      |
| FLAP            | T49652    | GACGATCTCCACCACCATCT      | AGAATGCTCTCAAGAGCTGAA     |
| IL6ST           | T61343    | TTAAAAGGTGGCAGCTCAGG      | TCATCACACGACCCATCAAC      |
| IL6ST           | AA406546  | GCTGGGCTCATGTAGTTATGG     | CATCAGAGTGGCTTAGGGACA     |
| ITGB7           | AI380522  | CATCACGACCACCATCAATC      | CTCCAGTTCCTTGTCTCCTC      |
| NAGLU           | W07099    | TCCAACAGCACCAGTTTGAC      | AGCCGGGGTAATATTTGAGG      |
| NAGLU           | W07099    | ACACTCCGGAGCAGTAGCC       | AAAGGACCCAGTGCCAGATT      |
| ROBO1           | AA173755  | CTGACCCCAGTGGAAAACA       | CCCTTAGTACTGCACGCCTTT     |
| SAMSN1          | AA063573  | AAAGACAAAACATTTCCACAAT    | CACATTTTATCCTGATCCACA     |
| 5-HTT           | BC069484  | CCTCCAGCCACTTATTTCCA      | ACCTCCATCCACATCCTCAC      |
| 18S             |           | CCGCAGCTAGGAATAATGGA      | CCCTCTTAATCATGGCCTCA      |
| Control Primers |           |                           |                           |
| MLC1            | AA196486  | TGAAGAGCTGAATGCCAAGA      | CCTTGTCAAAGACACGCAGA      |
| TCRb            | AA909476  | CATGAGCATCAGCCTTCTGT      | GAAAGGCCTGTCCACTCTCC      |
| Werner HIP      | AA189052  | GGCTATGGCAAAGGCTACAA      | GAGTCAGCACCTCCTCTGCT      |
